# Supplementary material for: Highlights on the reversible nonpolar-to-polar P3121–P31 phase transition at low temperature in NaLa(SO4)2·H2O: mechanism and piezoelectric properties
Source: Royal Society of Chemistry journal article supplement (doi:10.1039/d3cp00587a), 2023-01-01

## Supporting information

### Highlights on the reversible nonpolar-to-polar $P3_121$ - $P3_1$ phase transition at low temperature in $\text{NaLa}(\text{SO}_4)_2 \cdot \text{H}_2\text{O}$ : mechanism and piezoelectric properties

H. Azeroual,<sup>a</sup> J.-L. Bantignies,<sup>b</sup> D. Maurin,<sup>b</sup> D. Granier,<sup>a</sup> J. Haines,<sup>a</sup> O. Cambon,<sup>a</sup> and  
P. Hermet<sup>a</sup>

<sup>a</sup> ICGM, Univ. Montpellier, CNRS, ENSCM, Montpellier, France

<sup>b</sup> Laboratoire Charles Coulomb (L2C), CNRS, University of Montpellier, France

Table S1: Crystal data collection and structure refinement for  $\text{NaLa}(\text{SO}_4)_2 \cdot \text{H}_2\text{O}$  at 100K

|                                         |                                                                            |                              |
|-----------------------------------------|----------------------------------------------------------------------------|------------------------------|
| <b>Chemical formula</b>                 | $\text{H}_{0.67}\text{La}_{0.33}\text{Na}_{0.33}\text{O}_3\text{S}_{0.67}$ |                              |
| <b>Formula weight</b>                   | 124.01 g/mol                                                               |                              |
| <b>Temperature</b>                      | 100(2) K                                                                   |                              |
| <b>Wavelength</b>                       | 0.71073 Å                                                                  |                              |
| <b>Crystal system</b>                   | Trigonal                                                                   |                              |
| <b>Space group</b>                      | $P3_1$                                                                     |                              |
| <b>Unit cell dimensions</b>             | $a = 7.0227(5)$ Å                                                          | $\alpha = 90^\circ$          |
|                                         | $b = 7.0227(5)$ Å                                                          | $\beta = 90^\circ$           |
|                                         | $c = 12.9450(13)$ Å                                                        | $\gamma = 120^\circ$         |
| <b>Volume</b>                           | 552.89(10) Å <sup>3</sup>                                                  |                              |
| <b>Z</b>                                | 3                                                                          |                              |
| <b>Density (calculated)</b>             | 1.117 g/cm <sup>3</sup>                                                    |                              |
| <b>Absorption coefficient</b>           | 2.148 mm <sup>-1</sup>                                                     |                              |
| <b>F(000)</b>                           | 174                                                                        |                              |
| <b>Theta range for data collection</b>  | 3.15 to 52.27°                                                             |                              |
| <b>Index ranges</b>                     | -15<=h<=15, -15<=k<=15, -28<=l<=28                                         |                              |
| <b>Reflections collected</b>            | 27080                                                                      |                              |
| <b>Independent reflections</b>          | 8289 [R(int) = 0.0342]                                                     |                              |
| <b>Refinement method</b>                | Full-matrix least-squares on F <sup>2</sup>                                |                              |
| <b>Refinement program</b>               | SHELXL-2019/1 (Sheldrick, 2019)                                            |                              |
| <b>Function minimized</b>               | $\Sigma w(F_o^2 - F_c^2)^2$                                                |                              |
| <b>Data / restraints / parameters</b>   | 8289 / 1 / 120                                                             |                              |
| <b>Goodness-of-fit on F<sup>2</sup></b> | 1.041                                                                      |                              |
| <b>Final R indices</b>                  | 8289 data;<br>I>2σ(I)                                                      | R1 = 0.0150,<br>wR2 = 0.0351 |
|                                         | all data                                                                   | R1 = 0.0150,<br>wR2 = 0.0351 |

|                                     |                                                       |
|-------------------------------------|-------------------------------------------------------|
| <b>Weighting scheme</b>             | $w=1/[\sigma^2(F_o^2)]$<br>where $P=(F_o^2+2F_c^2)/3$ |
| <b>Absolute structure parameter</b> | 0.005(4)                                              |
| <b>Extinction coefficient</b>       | 0.0220(10)                                            |
| <b>Largest diff. peak and hole</b>  | 1.774 and -0.961 eÅ <sup>-3</sup>                     |

Table S2: Atomic coordinates and equivalent isotropic atomic displacement parameters (Å<sup>2</sup>) for NaLa(SO<sub>4</sub>)<sub>2</sub>.H<sub>2</sub>O at 100K

|      | x/a         | y/b         | z/c         | U(eq)       |
|------|-------------|-------------|-------------|-------------|
| La01 | 0.57677(2)  | 0.01318(2)  | 0.49361(2)  | 0.00218(10) |
| Na02 | 0.4649(2)   | 0.47075(16) | 0.65869(8)  | 0.00657(12) |
| S003 | 0.01571(10) | 0.57106(6)  | 0.57995(3)  | 0.00283(6)  |
| S004 | 0.45530(10) | 0.44530(10) | 0.40693(3)  | 0.00282(7)  |
| O001 | 0.8805(2)   | 0.6349(2)   | 0.64441(10) | 0.00602(15) |
| O002 | 0.1800(2)   | 0.7643(2)   | 0.52274(10) | 0.00682(17) |
| O003 | 0.8786(2)   | 0.4022(2)   | 0.50378(10) | 0.00670(17) |
| O004 | 0.6349(2)   | 0.4846(3)   | 0.33468(10) | 0.00673(18) |
| O005 | 0.5201(2)   | 0.6327(2)   | 0.47642(10) | 0.00683(17) |
| O006 | 0.1200(3)   | 0.4889(2)   | 0.65298(10) | 0.00572(15) |
| O007 | 0.2671(2)   | 0.4084(2)   | 0.34166(9)  | 0.00582(15) |
| O008 | 0.3956(2)   | 0.2495(2)   | 0.47172(10) | 0.00674(16) |
| O009 | 0.9344(3)   | 0.0196(3)   | 0.52408(14) | 0.0124(2)   |

Table S3: Bond lengths (Å) for NaLa(SO<sub>4</sub>)<sub>2</sub>.H<sub>2</sub>O at 100K

(With the Symmetry transformations : #1= x, y+1, z. #2= x+1, y, z. #3= x+1, y+1, z. #4= y+1, x-y, z+1/3. #5= -y+1, x-y+1, z+1/3 #6=-x+y, -x+1, z-1/3 . #7= -x+y+1, -x+2, z-1/3)

|             |            |             |            |
|-------------|------------|-------------|------------|
| La01-O002   | 2.4677(14) | La01-O003#3 | 2.4867(15) |
| La01-O005   | 2.5072(14) | La01-O009   | 2.5200(16) |
| La01-O008#1 | 2.5620(14) | La01-O004#5 | 2.5738(14) |
| La01-O006#6 | 2.5908(13) | La01-O001#6 | 2.6013(13) |
| La01-O007#5 | 2.6104(13) | La01-S004#5 | 3.1962(7)  |
| La01-S003#6 | 3.2026(7)  | La01-Na02#7 | 4.0263(13) |
| Na02-O007#5 | 2.4154(17) | Na02-O004#4 | 2.4499(17) |
| Na02-O003#5 | 2.4838(17) | Na02-O006   | 2.4895(19) |
| Na02-O001#2 | 2.5524(17) | Na02-O005   | 2.5631(17) |
| Na02-O008   | 2.7845(18) | Na02-O002#5 | 2.9406(18) |
| Na02-S004   | 3.2628(11) | Na02-S003#5 | 3.3034(11) |
| S003-O002   | 1.4681(14) | S003-O003   | 1.4709(14) |
| S003-O006   | 1.4785(14) | S003-O001   | 1.4918(14) |
| S004-O005   | 1.4658(14) | S004-O007   | 1.4785(14) |
| S004-O004   | 1.4811(15) | S004-O008   | 1.4812(14) |

Table S4: Bond angles (°) for NaLa(SO<sub>4</sub>)<sub>2</sub>·H<sub>2</sub>O at 100K

(With the Symmetry transformations: #1= x-1, y-1, z . #2= x-1, y, z . #3= x, y-1, z . #4= x, y+1, z . #5= x+1, y, z . #6= x+1, y+1, z . #7= -y+1, x-y, z+1/3 . #8= -y+1, x-y+1, z+1/3 . #9= -y+2, x-y+1, z+1/3 . #10= -x+y, -x+1, z-1/3 . #11= -x+y+1, -x+1, z-1/3 . #12= -x+y+1, -x+2, z-1/3)

|                      |             |                      |           |
|----------------------|-------------|----------------------|-----------|
| O002-La01-O003#6     | 144.14(5)   | O002-La01-O005       | 74.77(5)  |
| O003#6-La01-O005     | 140.32(5)   | O002-La01-O009       | 138.66(5) |
| O003#6-La01-O009     | 71.19(6)    | O005-La01-O009       | 70.04(5)  |
| O002-La01-O008#4     | 74.06(4)    | O003#6-La01-O008#4   | 73.78(5)  |
| O005-La01-O008#4     | 144.59(5)   | O009-La01-O008#4     | 144.96(5) |
| O002-La01-O004#8     | 77.89(5)    | O003#6-La01-O004#8   | 75.68(5)  |
| O005-La01-O004#8     | 120.64(4)   | O009-La01-O004#8     | 101.99(5) |
| O008#4-La01-O004#8   | 67.94(4)    | O002-La01-O006#10    | 69.16(4)  |
| O003#6-La01-O006#10  | 117.36(4)   | O005-La01-O006#10    | 77.14(5)  |
| O009-La01-O006#10    | 121.27(5)   | O008#4-La01-O006#10  | 76.41(5)  |
| O004#8-La01-O006#10  | 136.72(4)   | O002-La01-O001#10    | 123.49(4) |
| O003#6-La01-O001#10  | 73.12(4)    | O005-La01-O001#10    | 91.32(4)  |
| O009-La01-O001#10    | 78.83(5)    | O008#4-La01-O001#10  | 92.05(4)  |
| O004#8-La01-O001#10  | 146.65(5)   | O006#10-La01-O001#10 | 54.33(4)  |
| O002-La01-O007#8     | 80.43(4)    | O003#6-La01-O007#8   | 102.70(4) |
| O005-La01-O007#8     | 69.81(4)    | O009-La01-O007#8     | 67.67(5)  |
| O008#4-La01-O007#8   | 120.31(4)   | O004#8-La01-O007#8   | 54.23(4)  |
| O006#10-La01-O007#8  | 139.83(5)   | O001#10-La01-O007#8  | 145.41(4) |
| O002-La01-S004#8     | 78.98(3)    | O003#6-La01-S004#8   | 88.08(3)  |
| O005-La01-S004#8     | 95.74(3)    | O009-La01-S004#8     | 83.58(4)  |
| O008#4-La01-S004#8   | 94.42(3)    | O004#8-La01-S004#8   | 27.10(3)  |
| O006#10-La01-S004#8  | 148.12(3)   | O001#10-La01-S004#8  | 157.53(3) |
| O007#8-La01-S004#8   | 27.18(3)    | O002-La01-S003#10    | 96.14(3)  |
| O003#6-La01-S003#10  | 96.30(3)    | O005-La01-S003#10    | 82.32(3)  |
| O009-La01-S003#10    | 99.92(4)    | O008#4-La01-S003#10  | 84.71(3)  |
| O004#8-La01-S003#10  | 152.63(3)   | O006#10-La01-S003#10 | 27.02(3)  |
| O001#10-La01-S003#10 | 27.36(3)    | O007#8-La01-S003#10  | 151.89(3) |
| S004#8-La01-S003#10  | 175.087(9)  | O002-La01-Na02#12    | 142.51(4) |
| O003#6-La01-Na02#12  | 35.87(3)    | O005-La01-Na02#12    | 124.74(4) |
| O009-La01-Na02#12    | 77.46(4)    | O008#4-La01-Na02#12  | 74.84(3)  |
| O004#8-La01-Na02#12  | 108.84(4)   | O006#10-La01-Na02#12 | 83.60(4)  |
| O001#10-La01-Na02#12 | 38.19(3)    | O007#8-La01-Na02#12  | 134.24(4) |
| S004#8-La01-Na02#12  | 123.941(18) | S003#10-La01-Na02#12 | 60.51(2)  |
| O007#8-Na02-O004#7   | 152.98(7)   | O007#8-Na02-O003#8   | 88.70(6)  |

|                    |           |                    |           |
|--------------------|-----------|--------------------|-----------|
| O004#7-Na02-O003#8 | 75.12(6)  | O007#8-Na02-O006   | 76.35(6)  |
| O004#7-Na02-O006   | 129.78(7) | O003#8-Na02-O006   | 113.21(6) |
| O007#8-Na02-O001#5 | 78.68(5)  | O004#7-Na02-O001#5 | 76.15(6)  |
| O003#8-Na02-O001#5 | 74.02(6)  | O006-Na02-O001#5   | 153.72(7) |
| O007#8-Na02-O005   | 72.02(5)  | O004#7-Na02-O005   | 113.18(6) |
| O003#8-Na02-O005   | 151.25(7) | O006-Na02-O005     | 83.40(6)  |
| O001#5-Na02-O005   | 81.25(5)  | O007#8-Na02-O008   | 124.64(6) |
| O004#7-Na02-O008   | 66.13(5)  | O003#8-Na02-O008   | 140.95(7) |
| O006-Na02-O008     | 95.72(6)  | O001#5-Na02-O008   | 91.75(6)  |
| O005-Na02-O008     | 52.62(5)  | O007#8-Na02-O002#8 | 86.61(5)  |
| O004#7-Na02-O002#8 | 99.08(5)  | O003#8-Na02-O002#8 | 51.00(5)  |
| O006-Na02-O002#8   | 63.24(5)  | O001#5-Na02-O002#8 | 123.33(6) |
| O005-Na02-O002#8   | 144.05(7) | O008-Na02-O002#8   | 138.64(5) |
| O007#8-Na02-S004   | 97.75(5)  | O004#7-Na02-S004   | 90.42(5)  |
| O003#8-Na02-S004   | 157.98(6) | O006-Na02-S004     | 88.80(4)  |
| O001#5-Na02-S004   | 86.57(4)  | O005-Na02-S004     | 25.74(3)  |
| O008-Na02-S004     | 26.89(3)  | O002#8-Na02-S004   | 149.96(5) |
| O007#8-Na02-S003#8 | 87.15(4)  | O004#7-Na02-S003#8 | 86.68(4)  |
| O003#8-Na02-S003#8 | 24.62(3)  | O006-Na02-S003#8   | 89.03(5)  |
| O001#5-Na02-S003#8 | 97.81(5)  | O005-Na02-S003#8   | 158.97(5) |
| O008-Na02-S003#8   | 148.11(5) | O002#8-Na02-S003#8 | 26.39(3)  |
| S004-Na02-S003#8   | 174.02(4) | O007#8-Na02-La01#9 | 88.74(5)  |
| O004#7-Na02-La01#9 | 65.42(4)  | O003#8-Na02-La01#9 | 35.92(4)  |
| O006-Na02-La01#9   | 146.92(5) | O001#5-Na02-La01#9 | 39.06(3)  |
| O005-Na02-La01#9   | 120.18(5) | O008-Na02-La01#9   | 116.85(5) |
| O002#8-Na02-La01#9 | 86.87(4)  | S004-Na02-La01#9   | 122.78(4) |
| S003#8-Na02-La01#9 | 60.50(2)  | O007#8-Na02-La01   | 37.22(3)  |
| O004#7-Na02-La01   | 146.43(5) | O003#8-Na02-La01   | 125.16(5) |
| O006-Na02-La01     | 71.04(4)  | O001#5-Na02-La01   | 84.12(4)  |
| O005-Na02-La01     | 35.83(3)  | O008-Na02-La01     | 87.95(4)  |
| O002#8-Na02-La01   | 114.47(4) | S004-Na02-La01     | 61.17(2)  |
| S003#8-Na02-La01   | 123.17(3) | La01#9-Na02-La01   | 113.38(3) |
| O002-S003-O003     | 107.58(9) | O002-S003-O006     | 111.67(9) |
| O003-S003-O006     | 111.50(9) | O002-S003-O001     | 109.19(8) |
| O003-S003-O001     | 111.02(9) | O006-S003-O001     | 105.89(8) |
| O002-S003-La01#8   | 122.20(6) | O003-S003-La01#8   | 130.20(6) |
| O006-S003-La01#8   | 52.77(6)  | O001-S003-La01#8   | 53.26(5)  |
| O002-S003-Na02#10  | 62.89(6)  | O003-S003-Na02#10  | 44.71(6)  |
| O006-S003-Na02#10  | 127.13(6) | O001-S003-Na02#10  | 126.08(6) |

|                      |            |                      |           |
|----------------------|------------|----------------------|-----------|
| La01#8-S003-Na02#10  | 174.90(3)  | O005-S004-O007       | 110.93(8) |
| O005-S004-O004       | 111.54(10) | O007-S004-O004       | 105.97(9) |
| O005-S004-O008       | 107.62(9)  | O007-S004-O008       | 110.34(9) |
| O004-S004-O008       | 110.47(9)  | O005-S004-La01#10    | 130.04(6) |
| O007-S004-La01#10    | 53.76(5)   | O004-S004-La01#10    | 52.34(6)  |
| O008-S004-La01#10    | 122.35(6)  | O005-S004-Na02       | 49.40(6)  |
| O007-S004-Na02       | 124.94(6)  | O004-S004-Na02       | 128.92(6) |
| O008-S004-Na02       | 58.25(6)   | La01#10-S004-Na02    | 178.59(3) |
| S003-O001-Na02#2     | 131.35(8)  | S003-O001-La01#8     | 99.38(7)  |
| Na02#2-O001-La01#8   | 102.75(5)  | S003-O002-La01       | 144.99(9) |
| S003-O002-Na02#10    | 90.73(7)   | La01-O002-Na02#10    | 105.57(5) |
| S003-O003-Na02#10    | 110.67(8)  | S003-O003-La01#1     | 140.89(8) |
| Na02#10-O003-La01#1  | 108.20(5)  | S004-O004-Na02#11    | 143.40(9) |
| S004-O004-La01#10    | 100.56(7)  | Na02#11-O004-La01#10 | 115.39(6) |
| S004-O005-La01       | 145.47(8)  | S004-O005-Na02       | 104.86(8) |
| La01-O005-Na02       | 107.42(5)  | S003-O006-Na02       | 136.35(9) |
| S003-O006-La01#8     | 100.21(7)  | Na02-O006-La01#8     | 116.33(6) |
| S004-O007-Na02#10    | 139.69(9)  | S004-O007-La01#10    | 99.06(7)  |
| Na02#10-O007-La01#10 | 108.75(5)  | S004-O008-La01#3     | 131.48(8) |
| S004-O008-Na02       | 94.86(7)   | La01#3-O008-Na02     | 105.10(5) |

Table S5: Anisotropic atomic displacement parameters ( $\text{\AA}^2$ ) for  $\text{NaLa}(\text{SO}_4)_2 \cdot \text{H}_2\text{O}$  at 100K

|      | $U_{11}$    | $U_{22}$    | $U_{33}$    | $U_{23}$    | $U_{13}$     | $U_{12}$    |
|------|-------------|-------------|-------------|-------------|--------------|-------------|
| La01 | 0.00257(3)  | 0.00165(3)  | 0.00199(2)  | 0.00000(2)  | 0.00016(2)   | 0.00080(2)  |
| Na02 | 0.0080(4)   | 0.0068(2)   | 0.00599(18) | -0.0003(3)  | -0.0009(2)   | 0.0045(3)   |
| S003 | 0.00262(14) | 0.00273(15) | 0.00280(14) | 0.00015(8)  | 0.00016(13)  | 0.00107(11) |
| S004 | 0.00369(13) | 0.00293(15) | 0.00236(12) | 0.00001(11) | -0.00010(12) | 0.00205(10) |
| O001 | 0.0060(4)   | 0.0084(4)   | 0.0055(3)   | 0.0001(3)   | 0.0012(3)    | 0.0051(3)   |
| O002 | 0.0054(4)   | 0.0052(4)   | 0.0079(4)   | 0.0025(3)   | 0.0022(3)    | 0.0011(3)   |
| O003 | 0.0066(4)   | 0.0059(4)   | 0.0051(3)   | -0.0017(3)  | -0.0025(3)   | 0.0013(3)   |
| O004 | 0.0050(4)   | 0.0112(5)   | 0.0046(3)   | 0.0002(3)   | 0.0011(3)    | 0.0045(4)   |
| O005 | 0.0108(5)   | 0.0057(4)   | 0.0057(3)   | -0.0031(3)  | -0.0027(3)   | 0.0053(4)   |
| O006 | 0.0066(4)   | 0.0077(4)   | 0.0046(3)   | 0.0006(3)   | -0.0002(3)   | 0.0049(4)   |
| O007 | 0.0043(4)   | 0.0085(4)   | 0.0053(3)   | -0.0005(3)  | -0.0017(3)   | 0.0037(3)   |
| O008 | 0.0080(4)   | 0.0048(4)   | 0.0078(3)   | 0.0030(3)   | 0.0003(3)    | 0.0034(3)   |
| O009 | 0.0069(4)   | 0.0096(6)   | 0.0214(6)   | 0.0057(5)   | 0.0018(4)    | 0.0047(4)   |

Figure S1: Experimental mid-infrared spectra between 1800 and 3000  $\text{cm}^{-1}$  as a function of temperature

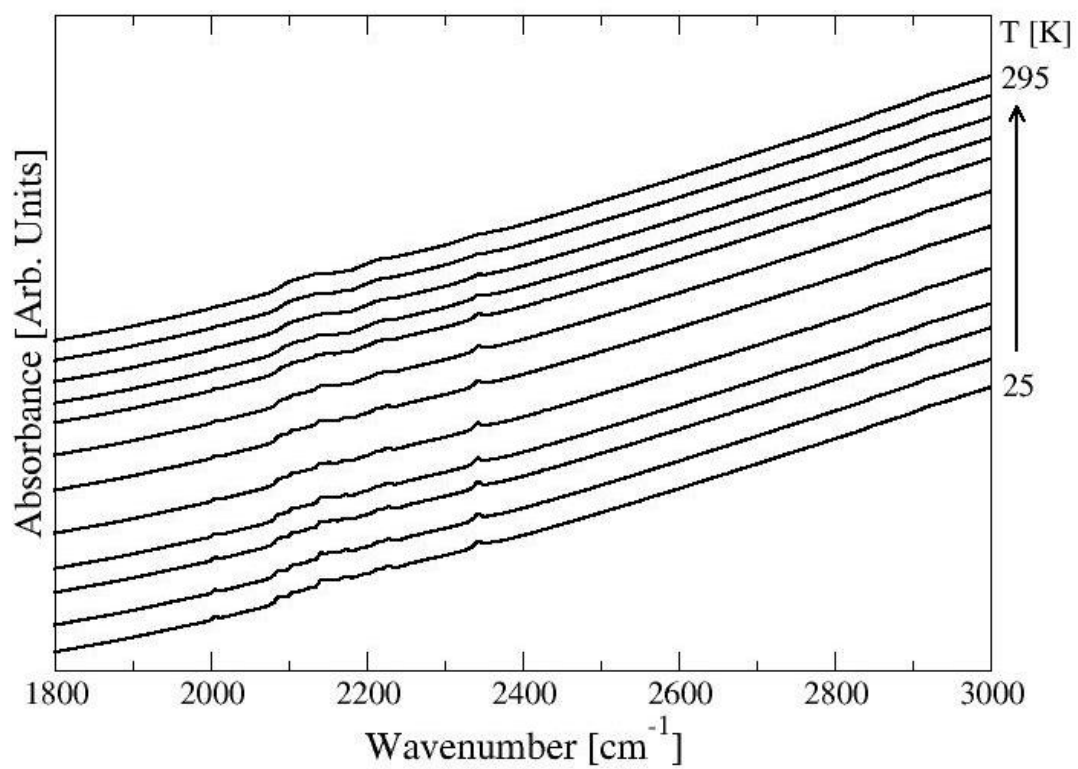

Supplement: d3cp00587a1.pdf [file d3cp00587a1.pdf]
